# Supplementary material for: “Dr. Google, I am in Pain”—Global Internet Searches Associated with Pain: A Retrospective Analysis of Google Trends Data
Source: PubMed Central journal article supplement (PMC7037174; doi:10.3390/ijerph17030954), 2020-02-04
Supplement: ijerph-17-00954-s001.pdf [file ijerph-17-00954-s001.pdf]

Supplementary File

Table S1

Checklist for Documentation of Google Trends research.

a) Initial list of pain locations and factors related to pain

| Name                            | Matched as topic related to pain (not disease diagnosis) |
|---------------------------------|----------------------------------------------------------|
| Head & Neck                     |                                                          |
| Headache / Head Pain            | Yes, „Headache“                                          |
| Eye pain                        | Yes „Eye pain“                                           |
| Nose pain                       | No                                                       |
| Ear pain                        | Yes, „Ear pain“                                          |
| Toothache                       | Yes, „Toothache“                                         |
| Tongue pain                     | No                                                       |
| Lip pain                        | No                                                       |
| Sore Throat                     | Yes, „Sore Throat“                                       |
| Neck pain                       | Yes, „Neck pain“                                         |
| Trunk                           |                                                          |
| Chest pain / Heart pain         | Yes, „Chest pain“                                        |
| Breast pain                     | Yes, „Breast pain“                                       |
| Abdominal pain / Stomache       | Yes, „Abdominal pain“                                    |
| Epigastric pain                 | Yes, „Epigastric pain“                                   |
| Umbilical pain                  | No                                                       |
| Flank pain                      | Yes, „Abdominal pain“                                    |
| Hypogastrium pain               | No                                                       |
| Groin pain                      | Yes, „Groin pain“                                        |
| Back pain                       | Yes, „Back pain“                                         |
| Low back pain / Lumbar pain     | Yes, „Low back pain“                                     |
| Pelvic region                   |                                                          |
| Pelvic pain                     | Yes, „Pelvic pain“                                       |
| Penis pain                      | Yes, „Penile pain“                                       |
| Testicular pain / Pain of balls | Yes, „Testicular pain“                                   |
| Rectum pain / Anal pain         | Yes, „Rectum pain“                                       |
| Limbs                           |                                                          |
| Shoulder pain                   | Yes, „Shoulder pain“                                     |
| Clavicle pain                   | No                                                       |
| Arm pain                        | No                                                       |

|                                      |                     |
|--------------------------------------|---------------------|
| Forearm pain                         | No                  |
| Wrist pain                           | Yes, „Wrist pain“   |
| Hand pain / Palm pain                | No                  |
| Thigh pain                           | No                  |
| Buttock pain                         | No                  |
| Knee pain                            | Yes, „Knee pain“    |
| Calf pain / Calf cramps              | No                  |
| Podalgia / Feet pain                 | Yes, „Podalgia“     |
| Factors                              |                     |
| Dysmenorrhea / Painful menses        | Yes, „Dysmenorrhea“ |
| Dyspareunia / Sex during intercourse | Yes, „Dyspareunia“  |
| Odynophagia / Pain during swallowing | Yes, „Odynophagia“  |
| Pain during breathing                | No                  |
| Pain during walking                  | No                  |

#### b) Search details

| Section/Topic                        | Checklist item                                                                                                                                                                                                                                                                                                                                                                             |
|--------------------------------------|--------------------------------------------------------------------------------------------------------------------------------------------------------------------------------------------------------------------------------------------------------------------------------------------------------------------------------------------------------------------------------------------|
| <b>Search Variables</b>              |                                                                                                                                                                                                                                                                                                                                                                                            |
| Access Date                          | 22 July 2019                                                                                                                                                                                                                                                                                                                                                                               |
| Time Period                          | From January 2004 to date of the collection (22 July 2019).                                                                                                                                                                                                                                                                                                                                |
| Query Category                       | All query categories were used                                                                                                                                                                                                                                                                                                                                                             |
| Region                               | Worldwide                                                                                                                                                                                                                                                                                                                                                                                  |
| Countries with Low Search Volume     | Excluded                                                                                                                                                                                                                                                                                                                                                                                   |
| <b>Search Input</b>                  |                                                                                                                                                                                                                                                                                                                                                                                            |
| Non-adjusted                         | Term recognized as topics: „Abdominal pain“, „Back pain“, „Breast pain“, „Chest pain“, „Dysmenorrhea“, „Dyspareunia“, „Ear pain“, „Epigastric pain“, „Eye pain“, „Groin pain“, „Headache“, „Knee pain“, „Low back pain“, „Neck pain“, „Odynophagia“, „Pelvic pain“, „Penile pain“, „Podalgia“, „Rectal pain“, „Shoulder pain“, „Sore throat“, „Testicular pain“, „Toothache“, „Wrist pain“ |
| Adjusted                             | „Abdominal pain“ + „Back pain“ / „Breast pain“ / „Chest pain“ / „Dysmenorrhea“ / „Dyspareunia“ / „Ear pain“ / „Epigastric pain“ / „Eye pain“ / „Groin pain“ / „Headache“ / „Knee pain“ / „Low back pain“ / „Neck pain“ / „Odynophagia“ / „Pelvic pain“ / „Penile pain“ / „Podalgia“ / „Rectal pain“ / „Shoulder pain“ / „Sore throat“ / „Testicular pain“ / „Toothache“ / „Wrist pain“     |
| <b>Rationale for Search Strategy</b> |                                                                                                                                                                                                                                                                                                                                                                                            |

---

|                    |                                                                          |
|--------------------|--------------------------------------------------------------------------|
| For Search Input   | The searched topics represents different location and conditions of pain |
| For Setting Chosen | We chose the abovementioned categories to not limit the output.          |

---

Table S2

Use of data generated by Google Trends.

|                   | Interest over time                                                          | Region                                                                                                  |
|-------------------|-----------------------------------------------------------------------------|---------------------------------------------------------------------------------------------------------|
|                   |                                                                             | Interest by region                                                                                      |
| Non-adjusted data | Time series analysis: yearly trends, seasonal variation (Table 4, Figure 3) | Countries with the highest RSV of pain-related topics (Table 3)                                         |
|                   |                                                                             | Compared breakdown by region                                                                            |
| Adjusted data     | Proportion of mean RSV to „Abdominal pain“ (Table 2, Figure 1)              | List of the most common pain-related topics in a specific country (Figures 2A-B, Supplementary Table 2) |

RSV – Relative Search Volume

Table S3

The five most common pain-related topics in a specific country.

Relative search volume estimated by using adjusted data of compared breakdown by region (abdominal pain + another pain-related topics).

| Country     | The five most common pain-related topics (RSV)                                              |
|-------------|---------------------------------------------------------------------------------------------|
| Algeria     | Abdominal pain (50), Back pain (40), Headache (38), Low back pain (23), Dysmenorrhea (17)   |
| Argentina   | Headache (62), Abdominal pain (50), Back pain (41), Sore throat (39), Low back pain (32)    |
| Australia   | Headache (54), Abdominal pain (50), Back pain (49), Sore throat (36), Chest pain (26)       |
| Austria     | Headache (65), Back pain (52), Sore throat (51), Abdominal pain (50), Toothache (33)        |
| Belarus     | Abdominal pain (50), Chest pain (23), Sore throat (23), Back pain (20), Toothache (14)      |
| Belgium     | Headache (55), Abdominal pain (50), Back pain (47), Sore throat (32), Low back pain (31)    |
| Bolivia     | Headache (53), Abdominal pain (50), Dysmenorrhea (15), Ear pain (13), Odynophagia (3)       |
| Brazil      | Headache (53), Abdominal pain (50), Back pain (38), Podalgia (31), Sore throat (26)         |
| Bulgaria    | Abdominal pain (50), Headache (43), Sore throat (22), Podalgia (19), Toothache (18)         |
| Canada      | Headache (57), Back pain (50), Abdominal pain (50), Sore throat (40), Chest pain (26)       |
| Chile       | Headache (57), Abdominal pain (50), Back pain (37), Low back pain (32), Sore throat (23)    |
| China       | Abdominal pain (50), Headache (39), Toothache (25), Dysmenorrhea (22), Sore throat (21)     |
| Colombia    | Headache (56), Abdominal pain (50), Back pain (30), Low back pain (23), Sore throat (20)    |
| Costa Rica  | Headache (52), Abdominal pain (50), Low back pain (23), Ear pain (16), Pelvic pain (4)      |
| Croatia     | Headache (53), Abdominal pain (50), Back pain (35), Chest pain (31), Podalgia (28)          |
| Czechia     | Abdominal pain (50), Headache (44), Neck pain (41), Back pain (38), Sore throat (35)        |
| Denmark     | Headache (67), Abdominal pain (50), Sore throat (44), Back pain (36), Low back pain (32)    |
| Ecuador     | Headache (55), Abdominal pain (50), Back pain (28), Low back pain (23), Sore throat (21)    |
| Egypt       | Abdominal pain (50), Headache (48), Back pain (30), Low back pain (17), Sore throat (16)    |
| Finland     | Headache (58), Abdominal pain (50), Back pain (46), Sore throat (43), Chest pain (30)       |
| France      | Abdominal pain (50), Headache (49), Back pain (41), Sore throat (31), Low back pain (26)    |
| Germany     | Headache (62), Back pain (54), Abdominal pain (50), Sore throat (48), Chest pain (32)       |
| Greece      | Abdominal pain (50), Headache (48), Neck pain (34), Sore throat (22), Back pain (21)        |
| Guatemala   | Abdominal pain (50), Dysmenorrhea (13), Ear pain (11), Testicular pain (2), Dyspareunia (1) |
| Hong Kong   | Abdominal pain (50), Headache (46), Sore throat (33), Back pain (25), Low back pain (22)    |
| Hungary     | Headache (58), Abdominal pain (50), Sore throat (38), Toothache (33), Back pain (27)        |
| India       | Headache (52), Abdominal pain (50), Back pain (46), Podalgia (27), Chest pain (24)          |
| Indonesia   | Headache (56), Abdominal pain (50), Toothache (41), Low back pain (21), Chest pain (18)     |
| Iran        | Headache (52), Abdominal pain (50), Low back pain (37), Back pain (36), Sore throat (32)    |
| Iraq        | Abdominal pain (50), Back pain (36), Low back pain (20), Podalgia (17), Toothache (15)      |
| Ireland     | Back pain (56), Headache (54), Abdominal pain (50), Sore throat (38), Podalgia (29)         |
| Israel      | Abdominal pain (50), Headache (38), Back pain (37), Sore throat (19), Podalgia (18)         |
| Italy       | Headache (68), Back pain (55), Abdominal pain (50), Chest pain (30), Knee pain (30)         |
| Japan       | Headache (54), Abdominal pain (50), Low back pain (40), Dysmenorrhea (20), Back pain (15)   |
| Jordan      | Abdominal pain (50), Headache (37), Back pain (31), Low back pain (19), Sore throat (19)    |
| Kazakhstan  | Abdominal pain (50), Headache (31), Chest pain (22), Sore throat (21), Toothache (13)       |
| Kenya       | Abdominal pain (50), Headache (48), Back pain (43), Chest pain (20), Sore throat (20)       |
| Kuwait      | Headache (51), Abdominal pain (50), Back pain (38), Low back pain (21), Dysmenorrhea (13)   |
| Malaysia    | Headache (52), Abdominal pain (50), Sore throat (32), Toothache (29), Back pain (26)        |
| Mexico      | Headache (55), Abdominal pain (50), Back pain (29), Sore throat (27), Low back pain (20)    |
| Morocco     | Abdominal pain (50), Headache (43), Back pain (40), Low back pain (23), Toothache (21)      |
| Netherlands | Headache (51), Abdominal pain (50), Back pain (42), Sore throat (29), Podalgia (20)         |
| New Zealand | Headache (56), Back pain (50), Abdominal pain (50), Sore throat (39), Chest pain (26)       |
| Nigeria     | Abdominal pain (50), Headache (45), Back pain (35), Sore throat (26), Chest pain (24)       |
| Norway      | Headache (65), Abdominal pain (50), Back pain (35), Sore throat (31), Podalgia (23)         |
| Oman        | Abdominal pain (50), Dysmenorrhea (14), Breast pain (10), Back pain (0), Chest pain (0)     |
| Pakistan    | Headache (55), Abdominal pain (50), Back pain (49), Podalgia (31), Sore throat (31)         |
| Peru        | Headache (59), Abdominal pain (50), Back pain (32), Low back pain (32), Sore throat (23)    |
| Philippines | Headache (50), Abdominal pain (50), Back pain (41), Sore throat (31), Dysmenorrhea (28)     |
| Poland      | Abdominal pain (50), Headache (40), Sore throat (24), Back pain (21), Podalgia (21)         |

|                      |                                                                                           |
|----------------------|-------------------------------------------------------------------------------------------|
| Portugal             | Headache (51), Abdominal pain (50), Back pain (40), Sore throat (27), Podalgia (26)       |
| Romania              | Headache (56), Back pain (51), Abdominal pain (50), Neck pain (42), Podalgia (32)         |
| Russia               | Abdominal pain (50), Headache (28), Sore throat (24), Chest pain (23), Back pain (18)     |
| Saudi Arabia         | Abdominal pain (50), Headache (44), Back pain (32), Sore throat (19), Low back pain (18)  |
| Singapore            | Headache (52), Abdominal pain (50), Back pain (40), Sore throat (39), Chest pain (21)     |
| Slovakia             | Headache (50), Abdominal pain (50), Sore throat (33), Back pain (27), Toothache (27)      |
| South Africa         | Headache (53), Abdominal pain (50), Back pain (43), Chest pain (23), Sore throat (22)     |
| South Korea          | Headache (58), Abdominal pain (50), Back pain (44), Chest pain (31), Dysmenorrhea (29)    |
| Spain                | Abdominal pain (50), Headache (49), Back pain (38), Low back pain (34), Sore throat (26)  |
| Sweden               | Headache (75), Back pain (67), Sore throat (67), Dysmenorrhea (56), Abdominal pain (50)   |
| Switzerland          | Headache (61), Back pain (50), Abdominal pain (50), Sore throat (40), Chest pain (27)     |
| Taiwan               | Abdominal pain (50), Headache (46), Sore throat (30), Chest pain (22), Low back pain (21) |
| Thailand             | Abdominal pain (50), Headache (45), Back pain (30), Sore throat (26), Pelvic pain (18)    |
| Turkey               | Headache (51), Abdominal pain (50), Toothache (37), Groin pain (36), Back pain (34)       |
| Ukraine              | Abdominal pain (50), Headache (34), Sore throat (25), Chest pain (24), Back pain (22)     |
| United Arab Emirates | Abdominal pain (50), Headache (49), Back pain (45), Sore throat (28), Chest pain (21)     |
| United Kingdom       | Headache (52), Back pain (51), Abdominal pain (50), Sore throat (32), Chest pain (26)     |
| United States        | Headache (59), Back pain (52), Abdominal pain (50), Sore throat (40), Chest pain (28)     |
| Venezuela            | Abdominal pain (50), Headache (49), Back pain (24), Low back pain (21), Neck pain (18)    |
| Vietnam              | Neck pain (62), Abdominal pain (50), Headache (32), Back pain (17), Podalgia (15)         |

RSV – Relative Search Volume

Datasets are available in Mendeley repository:

DOI: 10.17632/9x6jdhbz5b.1

Kamiński, Mikołaj; Łoniewski, Igor; Marlicz, Wojciech (2020), ""Dr. Google, I am in pain" – Global Internet searches associated with pain: A retrospective analysis of Google Trends data", Mendeley Data, V1, doi:
